# Supplementary material for: Synonymous Variants of Uncertain Silence
Source: Int J Mol Sci. 2023 Jun 23;24(13):10556. doi: 10.3390/ijms241310556 (PMC10341574; doi:10.3390/ijms241310556)
Supplement: Supplementary file 1 [file ijms-24-10556-s001.zip › Table S1.xlsx]

## Sheet: synonymousWithStats
#Variant ID	Position	Ref Genotype	Alt Genotype	Ref AA	Alt AA	Cell Line	Replicate Number	Barcode Count	Activity (RPM High / (High + Low))	DeltaG	Ref Codon Frequency	Alt Codon Frequency	Codon Frequency Difference (Alt - Ref)	CellLinePValue	CellLineQValue
Tat_D5D	5	GAT	GAC	D	D	293T	2	2	46.7364	-60.4	0.46	0.54	0.08	0.0658008	0.0283944
Tat_D5D	5	GAT	GAC	D	D	JLTRG	1	2	0	-60.4	0.46	0.54	0.08	0.00459248	0.00537984
Tat_L8L	8	CTA	CTC	L	L	293T	1	2	0	-60.4	0.07	0.2	0.13	7.84583e-05	6.39508e-05
Tat_L8L	8	CTA	CTC	L	L	JLTRG	1	1	100	-60.4	0.07	0.2	0.13	0.0249841	0.0241027
Tat_P10P	10	CCC	CCG	P	P	293T	1	1	100	-56.1	0.33	0.11	-0.22	0.223502	0.072168
Tat_P10P	10	CCC	CCG	P	P	293T	2	1	100	-56.1	0.33	0.11	-0.22	0.223502	0.072168
Tat_P10P	10	CCC	CCG	P	P	JLTRG	1	2	99.2883	-56.1	0.33	0.11	-0.22	0.319496	0.166343
Tat_P10P	10	CCC	CCG	P	P	JLTRG	2	2	99.1175	-56.1	0.33	0.11	-0.22	0.319496	0.166343
Tat_H13H	13	CAT	CAC	H	H	293T	1	2	0	-59.4	0.41	0.59	0.18	1.83123e-06	1.7522e-06
Tat_H13H	13	CAT	CAC	H	H	293T	2	2	0	-59.4	0.41	0.59	0.18	1.83123e-06	1.7522e-06
Tat_H13H	13	CAT	CAC	H	H	JLTRG	2	1	46.7364	-59.4	0.41	0.59	0.18	0.11247	0.0819795
Tat_P18P	18	CCT	CCC	P	P	293T	2	2	8.45538	-57.7	0.28	0.33	0.05	0.011188	0.00703485
Tat_K19K	19	AAA	AAG	K	K	293T	1	3	6.07811	-63.4	0.42	0.58	0.16	0.000106862	8.39913e-05
Tat_K19K	19	AAA	AAG	K	K	293T	2	1	5.49039	-63.4	0.42	0.58	0.16	0.000106862	8.39913e-05
Tat_K19K	19	AAA	AAG	K	K	JLTRG	1	1	18.3436	-63.4	0.42	0.58	0.16	0.667442	0.27956
Tat_K19K	19	AAA	AAG	K	K	JLTRG	2	1	21.9229	-63.4	0.42	0.58	0.16	0.667442	0.27956
Tat_T23T	23	ACC	ACA	T	T	293T	1	2	89.5823	-58.3	0.36	0.28	-0.08	1.69813e-45	6.22861e-45
Tat_T23T	23	ACC	ACA	T	T	293T	2	2	99.5407	-58.3	0.36	0.28	-0.08	1.69813e-45	6.22861e-45
Tat_T23T	23	ACC	ACA	T	T	JLTRG	1	2	99.6879	-58.3	0.36	0.28	-0.08	0.000366209	0.000571992
Tat_T23T	23	ACC	ACA	T	T	JLTRG	2	3	89.4375	-58.3	0.36	0.28	-0.08	0.000366209	0.000571992
Tat_T23T	23	ACC	ACT	T	T	293T	1	2	95.1275	-58.4	0.36	0.24	-0.12	1.69813e-45	6.22861e-45
Tat_T23T	23	ACC	ACT	T	T	293T	2	2	58.9728	-58.4	0.36	0.24	-0.12	1.69813e-45	6.22861e-45
Tat_T23T	23	ACC	ACT	T	T	JLTRG	1	2	98.9927	-58.4	0.36	0.24	-0.12	0.000366209	0.000571992
Tat_T23T	23	ACC	ACT	T	T	JLTRG	2	2	88.5246	-58.4	0.36	0.24	-0.12	0.000366209	0.000571992
Tat_C30C	30	TGT	TGC	C	C	293T	1	2	38.7526	-60.1	0.45	0.55	0.1	1.04037e-14	1.34683e-14
Tat_C30C	30	TGT	TGC	C	C	293T	2	2	52.9788	-60.1	0.45	0.55	0.1	1.04037e-14	1.34683e-14
Tat_C30C	30	TGT	TGC	C	C	JLTRG	1	3	74.0376	-60.1	0.45	0.55	0.1	2.70593e-05	4.43779e-05
Tat_C30C	30	TGT	TGC	C	C	JLTRG	2	3	73.1036	-60.1	0.45	0.55	0.1	2.70593e-05	4.43779e-05
Tat_H33H	33	CAT	CAC	H	H	293T	1	2	100	-61	0.41	0.59	0.18	1.21549e-15	1.78333e-15
Tat_H33H	33	CAT	CAC	H	H	293T	2	2	8.88339	-61	0.41	0.59	0.18	1.21549e-15	1.78333e-15
Tat_C34C	34	TGC	TGT	C	C	293T	1	3	98.7564	-61.8	0.55	0.45	-0.1	0.0921095	0.0382472
Tat_C34C	34	TGC	TGT	C	C	293T	2	2	67.2565	-61.8	0.55	0.45	-0.1	0.0921095	0.0382472
Tat_C34C	34	TGC	TGT	C	C	JLTRG	1	2	81.6765	-61.8	0.55	0.45	-0.1	1.88439e-09	3.86306e-09
Tat_C34C	34	TGC	TGT	C	C	JLTRG	2	2	57.785	-61.8	0.55	0.45	-0.1	1.88439e-09	3.86306e-09
Tat_F38F	38	TTC	TTT	F	F	293T	1	2	66.5235	-60.4	0.55	0.45	-0.1	0.0524347	0.0239909
Tat_F38F	38	TTC	TTT	F	F	293T	2	2	95.3432	-60.4	0.55	0.45	-0.1	0.0524347	0.0239909
Tat_F38F	38	TTC	TTT	F	F	JLTRG	1	1	100	-60.4	0.55	0.45	-0.1	2.60296e-22	1.42297e-21
Tat_F38F	38	TTC	TTT	F	F	JLTRG	2	1	96.398	-60.4	0.55	0.45	-0.1	2.60296e-22	1.42297e-21
Tat_T40T	40	ACA	ACC	T	T	293T	1	1	0	-62.2	0.28	0.36	0.08	0.211069	0.0703803
Tat_T40T	40	ACA	ACC	T	T	293T	2	1	0	-62.2	0.28	0.36	0.08	0.211069	0.0703803
Tat_T40T	40	ACA	ACC	T	T	JLTRG	1	2	100	-62.2	0.28	0.36	0.08	0.357247	0.176045
Tat_T40T	40	ACA	ACC	T	T	JLTRG	2	2	93.3507	-62.2	0.28	0.36	0.08	0.357247	0.176045
Tat_K41K	41	AAA	AAG	K	K	293T	1	4	100	-60.4	0.42	0.58	0.16	0.0194694	0.0112756
Tat_K41K	41	AAA	AAG	K	K	293T	2	2	83.2242	-60.4	0.42	0.58	0.16	0.0194694	0.0112756
Tat_K41K	41	AAA	AAG	K	K	JLTRG	1	4	99.353	-60.4	0.42	0.58	0.16	1.06909e-10	2.50476e-10
Tat_K41K	41	AAA	AAG	K	K	JLTRG	2	2	100	-60.4	0.42	0.58	0.16	1.06909e-10	2.50476e-10
Tat_A42A	42	GCC	GCA	A	A	293T	1	1	0	-59.2	0.4	0.23	-0.17	0.00741457	0.00494473
Tat_A42A	42	GCC	GCA	A	A	293T	2	1	0	-59.2	0.4	0.23	-0.17	0.00741457	0.00494473
Tat_A42A	42	GCC	GCA	A	A	JLTRG	1	2	6.26435	-59.2	0.4	0.23	-0.17	2.82753e-07	5.28948e-07
Tat_A42A	42	GCC	GCA	A	A	JLTRG	2	1	26.4531	-59.2	0.4	0.23	-0.17	2.82753e-07	5.28948e-07
Tat_G44G	44	GGC	GGG	G	G	293T	1	2	0	-63.2	0.34	0.25	-0.09	0.0184524	0.0109755
Tat_G44G	44	GGC	GGG	G	G	JLTRG	1	2	0	-63.2	0.34	0.25	-0.09	0.0224016	0.0222662
Tat_S46S	46	TCC	TCG	S	S	JLTRG	1	2	0	-58.8	0.22	0.06	-0.16	1	0.395186
Tat_S46S	46	TCC	TCG	S	S	JLTRG	2	1	0	-58.8	0.22	0.06	-0.16	1	0.395186
Tat_Y47Y	47	TAT	TAC	Y	Y	293T	1	6	30.4941	-60.4	0.43	0.57	0.14	0.00527132	0.00374221
Tat_Y47Y	47	TAT	TAC	Y	Y	JLTRG	1	2	0	-60.4	0.43	0.57	0.14	0.448342	0.207938
Tat_Y47Y	47	TAT	TAC	Y	Y	JLTRG	2	2	0	-60.4	0.43	0.57	0.14	0.448342	0.207938
Tat_R55R	55	CGA	AGA	R	R	293T	1	2	91.3265	-59.2	0.11	0.2	0.09	0.0952404	0.0388149
Tat_R55R	55	CGA	AGA	R	R	JLTRG	2	2	0	-59.2	0.11	0.2	0.09	0.203724	0.122193
Tat_R57R	57	AGA	CGG	R	R	293T	2	2	0	-63.6	0.2	0.21	0.01	1	0.265151
Tat_H59H	59	CAT	CAC	H	H	293T	1	2	0	-61.9	0.41	0.59	0.18	0.557275	0.15355
Tat_H59H	59	CAT	CAC	H	H	293T	2	1	0	-61.9	0.41	0.59	0.18	0.557275	0.15355
Tat_H59H	59	CAT	CAC	H	H	JLTRG	1	2	0	-61.9	0.41	0.59	0.18	0.483052	0.217046
Tat_H59H	59	CAT	CAC	H	H	JLTRG	2	4	46.7364	-61.9	0.41	0.59	0.18	0.483052	0.217046
Tat_S62S	62	AGT	AGC	S	S	293T	1	4	88.6139	-60.4	0.15	0.24	0.09	0.446395	0.129264
Tat_S62S	62	AGT	AGC	S	S	293T	2	2	66.4533	-60.4	0.15	0.24	0.09	0.446395	0.129264
Tat_S62S	62	AGT	AGC	S	S	JLTRG	1	4	73.0613	-60.4	0.15	0.24	0.09	0.313962	0.166098
Tat_S62S	62	AGT	AGC	S	S	JLTRG	2	3	99.6277	-60.4	0.15	0.24	0.09	0.313962	0.166098
Tat_T64T	64	ACT	ACC	T	T	293T	1	5	82.3936	-60.2	0.24	0.36	0.12	0.00824866	0.00533919
Tat_T64T	64	ACT	ACC	T	T	293T	2	2	30.4941	-60.2	0.24	0.36	0.12	0.00824866	0.00533919
Tat_T64T	64	ACT	ACC	T	T	JLTRG	1	3	16.3173	-60.2	0.24	0.36	0.12	0.0698232	0.0572558
Tat_T64T	64	ACT	ACC	T	T	JLTRG	2	3	100	-60.2	0.24	0.36	0.12	0.0698232	0.0572558
Tat_H65H	65	CAT	CAC	H	H	293T	1	3	95.4667	-59.5	0.41	0.59	0.18	0.388799	0.115628
Tat_H65H	65	CAT	CAC	H	H	293T	2	4	97.97	-59.5	0.41	0.59	0.18	0.388799	0.115628
Tat_H65H	65	CAT	CAC	H	H	JLTRG	1	7	53.8185	-59.5	0.41	0.59	0.18	0.637228	0.275018
Tat_H65H	65	CAT	CAC	H	H	JLTRG	2	3	100	-59.5	0.41	0.59	0.18	0.637228	0.275018
Tat_Q66Q	66	CAA	CAG	Q	Q	293T	2	3	100	-60.1	0.25	0.75	0.5	0.388456	0.115628
Tat_Q66Q	66	CAA	CAG	Q	Q	JLTRG	1	1	100	-60.1	0.25	0.75	0.5	0.312867	0.166098
Tat_Q66Q	66	CAA	CAG	Q	Q	JLTRG	2	1	100	-60.1	0.25	0.75	0.5	0.312867	0.166098
Tat_A67A	67	GCT	GCC	A	A	293T	2	2	46.7364	-58.2	0.26	0.4	0.14	0.117994	0.044833
Tat_A67A	67	GCT	GCC	A	A	JLTRG	2	3	81.4377	-58.2	0.26	0.4	0.14	0.0797211	0.0637778
Tat_S68S	68	TCT	TCC	S	S	293T	1	1	47.6681	-60.2	0.18	0.22	0.04	0.10988	0.0439668
Tat_S68S	68	TCT	TCC	S	S	293T	2	3	99.4551	-60.2	0.18	0.22	0.04	0.10988	0.0439668
Tat_S68S	68	TCT	TCC	S	S	JLTRG	1	2	74.8792	-60.2	0.18	0.22	0.04	0.25734	0.1488
Tat_S68S	68	TCT	TCC	S	S	JLTRG	2	2	82.7172	-60.2	0.18	0.22	0.04	0.25734	0.1488
Tat_L69L	69	CTA	CTC	L	L	293T	1	3	0	-60.2	0.07	0.2	0.13	0.0239417	0.0135102
Tat_L69L	69	CTA	CTC	L	L	293T	2	5	0	-60.2	0.07	0.2	0.13	0.0239417	0.0135102
Tat_L69L	69	CTA	CTC	L	L	JLTRG	1	1	0	-60.2	0.07	0.2	0.13	4.79023e-17	1.96402e-16
Tat_L69L	69	CTA	CTC	L	L	JLTRG	2	4	63.7011	-60.2	0.07	0.2	0.13	4.79023e-17	1.96402e-16
Tat_L69L	69	CTA	CTG	L	L	293T	1	2	46.7364	-63.8	0.07	0.41	0.34	0.0239417	0.0135102
Tat_L69L	69	CTA	CTG	L	L	293T	2	2	0	-63.8	0.07	0.41	0.34	0.0239417	0.0135102
Tat_L69L	69	CTA	CTG	L	L	JLTRG	1	2	0	-63.8	0.07	0.41	0.34	4.79023e-17	1.96402e-16
Tat_S70S	70	TCA	TCG	S	S	293T	1	1	45.4284	-62.8	0.15	0.06	-0.09	3.93367e-08	3.93501e-08
Tat_S70S	70	TCA	TCG	S	S	JLTRG	1	2	100	-62.8	0.15	0.06	-0.09	0.338035	0.173245
Tat_S70S	70	TCA	TCG	S	S	JLTRG	2	2	99.144	-62.8	0.15	0.06	-0.09	0.338035	0.173245
Tat_Q72Q	72	CAA	CAG	Q	Q	JLTRG	1	2	0	-60.4	0.25	0.75	0.5	6.6949e-07	1.15577e-06
Tat_Q72Q	72	CAA	CAG	Q	Q	JLTRG	2	3	30.4941	-60.4	0.25	0.75	0.5	6.6949e-07	1.15577e-06
Tat_P73P	73	CCC	CCT	P	P	293T	1	1	100	-61.7	0.33	0.28	-0.05	1.12825e-12	1.37944e-12
Tat_P73P	73	CCC	CCT	P	P	JLTRG	1	2	91.94	-61.7	0.33	0.28	-0.05	0.187483	0.122193
Tat_P73P	73	CCC	CCT	P	P	JLTRG	2	1	100	-61.7	0.33	0.28	-0.05	0.187483	0.122193
Tat_S75S	75	TCC	TCG	S	S	JLTRG	2	2	0	-62	0.22	0.06	-0.16	0.701714	0.287707
Tat_Q76Q	76	CAA	CAG	Q	Q	293T	1	4	0	-60.4	0.25	0.75	0.5	0.558174	0.15355
Tat_Q76Q	76	CAA	CAG	Q	Q	293T	2	1	100	-60.4	0.25	0.75	0.5	0.558174	0.15355
Tat_Q76Q	76	CAA	CAG	Q	Q	JLTRG	1	5	36.9073	-60.4	0.25	0.75	0.5	1	0.395186
Tat_S77S	77	TCC	TCA	S	S	293T	1	1	100	-59.4	0.22	0.15	-0.07	0.424095	0.124444
Tat_S77S	77	TCC	TCA	S	S	293T	2	2	69.0739	-59.4	0.22	0.15	-0.07	0.424095	0.124444
Tat_S77S	77	TCC	TCA	S	S	JLTRG	1	2	57.3938	-59.4	0.22	0.15	-0.07	0.450104	0.207938
Tat_S77S	77	TCC	TCA	S	S	JLTRG	2	2	54.7863	-59.4	0.22	0.15	-0.07	0.450104	0.207938
Tat_S77S	77	TCC	TCG	S	S	293T	1	2	0	-62.3	0.22	0.06	-0.16	0.424095	0.124444
Tat_S77S	77	TCC	TCG	S	S	293T	2	4	63.7011	-62.3	0.22	0.06	-0.16	0.424095	0.124444
Tat_S77S	77	TCC	TCG	S	S	JLTRG	1	3	36.9073	-62.3	0.22	0.06	-0.16	0.450104	0.207938
Tat_S77S	77	TCC	TCG	S	S	JLTRG	2	1	100	-62.3	0.22	0.06	-0.16	0.450104	0.207938
Tat_R78R	78	CGA	AGG	R	R	293T	1	2	0	-62.4	0.11	0.2	0.09	0.141049	0.0485023
Tat_R78R	78	CGA	AGG	R	R	293T	2	2	100	-62.4	0.11	0.2	0.09	0.141049	0.0485023
Tat_R78R	78	CGA	AGG	R	R	JLTRG	1	2	100	-62.4	0.11	0.2	0.09	0.407599	0.19376
Tat_R78R	78	CGA	AGG	R	R	JLTRG	2	3	0	-62.4	0.11	0.2	0.09	0.407599	0.19376
Tat_R78R	78	CGA	CGC	R	R	293T	1	4	46.7364	-61.7	0.11	0.19	0.08	0.141049	0.0485023
Tat_R78R	78	CGA	CGC	R	R	293T	2	11	63.7011	-61.7	0.11	0.19	0.08	0.141049	0.0485023
Tat_R78R	78	CGA	CGC	R	R	JLTRG	1	8	36.9073	-61.7	0.11	0.19	0.08	0.407599	0.19376
Tat_R78R	78	CGA	CGG	R	R	293T	1	2	0	-62.4	0.11	0.21	0.1	0.141049	0.0485023
Tat_R78R	78	CGA	CGG	R	R	293T	2	2	29.4699	-62.4	0.11	0.21	0.1	0.141049	0.0485023
Tat_R78R	78	CGA	CGG	R	R	JLTRG	1	2	16.4564	-62.4	0.11	0.21	0.1	0.407599	0.19376
Tat_R78R	78	CGA	CGG	R	R	JLTRG	2	2	43.4316	-62.4	0.11	0.21	0.1	0.407599	0.19376
Tat_G79G	79	GGG	GGA	G	G	293T	1	2	87.5306	-56.2	0.25	0.25	0	0.000533029	0.000404505
Tat_G79G	79	GGG	GGA	G	G	293T	2	2	97.6808	-56.2	0.25	0.25	0	0.000533029	0.000404505
Tat_G79G	79	GGG	GGA	G	G	JLTRG	1	1	45.9342	-56.2	0.25	0.25	0	0.00116777	0.00159597
Tat_G79G	79	GGG	GGA	G	G	JLTRG	2	1	53.0109	-56.2	0.25	0.25	0	0.00116777	0.00159597
Tat_G79G	79	GGG	GGC	G	G	293T	1	6	33.8558	-58.3	0.25	0.34	0.09	0.000533029	0.000404505
Tat_G79G	79	GGG	GGC	G	G	293T	2	10	0	-58.3	0.25	0.34	0.09	0.000533029	0.000404505
Tat_G79G	79	GGG	GGC	G	G	JLTRG	1	6	14.9291	-58.3	0.25	0.34	0.09	0.00116777	0.00159597
Tat_G79G	79	GGG	GGC	G	G	JLTRG	2	6	39.6896	-58.3	0.25	0.34	0.09	0.00116777	0.00159597
Tat_P81P	81	CCG	CCC	P	P	293T	1	2	73.3106	-60.4	0.11	0.33	0.22	1.63058e-18	2.76039e-18
Tat_P81P	81	CCG	CCC	P	P	293T	2	3	36.7805	-60.4	0.11	0.33	0.22	1.63058e-18	2.76039e-18
Tat_P81P	81	CCG	CCC	P	P	JLTRG	1	2	71.2574	-60.4	0.11	0.33	0.22	0.0472385	0.0407749
Tat_P81P	81	CCG	CCC	P	P	JLTRG	2	2	100	-60.4	0.11	0.33	0.22	0.0472385	0.0407749
Tat_T82T	82	ACA	ACC	T	T	293T	2	1	0	-60.5	0.28	0.36	0.08	0.131777	0.0469733
Tat_T82T	82	ACA	ACC	T	T	JLTRG	1	2	93.7173	-60.5	0.28	0.36	0.08	0.263358	0.148935
Tat_G83G	83	GGC	GGG	G	G	293T	1	3	72.4697	-62.4	0.34	0.25	-0.09	0.0296513	0.0159159
Tat_G83G	83	GGC	GGG	G	G	293T	2	2	30.4941	-62.4	0.34	0.25	-0.09	0.0296513	0.0159159
Tat_P84P	84	CCG	CCA	P	P	293T	1	2	0	-60	0.11	0.27	0.16	1.20711e-102	8.85515e-102

## Sheet: Column Names
Column Name	Definition
#Variant ID	Variant ID, Identified by concatonating the gene, reference amino acid, amino acid position (1-based), and alt amino acid
Position	Amino acid position (1-based)
Ref Genotype	Reference genotype of the codon that was substituted
Alt Genotype	Alt genotype of the codon that was substituted
Ref AA	Reference amino acid resulting from translation of the reference genotype
Alt AA	Alt amino acid resulting from translation of the alt genotype
Cell Line	Cell line from which the data came from
Replicate Number	Technical replicate from which the data came from
Barcode Count	Number of barcodes associated with the mutant
Activity (RPM High / (High + Low))	Mutant activity, as measured in normalized reads (reads per million) of the GFP high pool over the sum of the GFP high pool and the GFP low pool across all barcodes
DeltaG	DeltaG corresponding to the RNA folding of the resulting sequence
Ref Codon Frequency	Relative codon frequency of the reference codon in regards to overal frequency for the amino acid
Alt Codon Frequency	Relative codon frequency of the alt codon in regards to overal frequency for the amino acid
Codon Frequency Difference (Alt - Ref)	Codon frequency difference incurred by the change of codons, negatives imply a change to a more rare codon, positives imply a change to a more common codon
CellLinePValue	p-value for statistical significance of the mixed logistic regression performed on all data corresponding to the mutant's cell line
CellLineQValue	q-value for statistical significance of the mixed logistic regression performed on all data corresponding to the mutant's cell line
